# Supplementary material for: Transcriptional analysis of Mycobacterium fortuitum cultures upon hydrogen peroxide treatment using the novel standard rrnA-P1
Source: PubMed Central journal article supplement (PMC2443159; doi:10.1186/1471-2180-8-100), 2008-06-19
Supplement: 1471-2180-8-100-S1.pdf [file 1471-2180-8-100-S1.pdf]

NUÑEZ et al. “Transcriptional analysis of *Mycobacterium fortuitum* cultures upon hydrogen peroxide treatment using the novel standard *rrnA*-P1”. 2008.

ADDITIONAL FILE 1

DATA corresponding to Figure 1.

Densitometry of a representative gel of proteins' activity.

|               | <b>KatGI</b> | <b>KatGII</b> | <b>SodA</b> |
|---------------|--------------|---------------|-------------|
| 0.02mM 30min  | 19.12        | 85.4          | 109.2       |
| 0.02mM 60min  | 22.5         | 80.7          | 103.9       |
| 0.02mM 120min | 19.66        | 89.34         | 110.9       |
| 2mM 30min     | 16.4         | 62.3          | 102.6       |
| 2mM 60min     | 16           | 71.02         | 123.8       |
| 2mM 120min    | 14.9         | 76.21         | 113.8       |
| 20mM 30min    | 20.67        | 30.8          | 113.8       |
| 20mM 60min    | 20.8         | 42.8          | 128.6       |
| 20mM 120min   | 21.6         | 68.1          | 124.4       |
| Control       | 100          | 100           | 100         |

DATA corresponding to Figure 3.

Radioactive cpm values obtained in a representative experiment using Northern Blot analysis.

Cpm values before normalization

|               | <b><i>rrs</i> (16S)</b> | <b><i>katGII</i></b> | <b><i>sodA</i></b> |
|---------------|-------------------------|----------------------|--------------------|
| 0.02mM 30min  | 36                      | 18.93                | 45                 |
| 0.02mM 60min  | 40                      | 22.4                 | 34                 |
| 0.02mM 120min | 66                      | 20.8                 | 67                 |
| 0.2mM 30min   | 54                      | 48.16                | 68                 |
| 0.2mM 60min   | 60                      | 32.48                | 63                 |
| 0.2mM 120min  | 56                      | 28                   | 68                 |
| 2mM 30min     | 72                      | 41.36                | 70                 |
| 2mM 60min     | 72                      | 30.4                 | 71                 |
| 2mM 120min    | 72                      | 66.4                 | 78                 |
| 20mM 30min    | 70                      | 320                  | 113                |
| 20mM 60min    | 62                      | 45.6                 | 63                 |
| 20mM 120min   | 66                      | 33.6                 | 102                |
| Control       | 70                      | 34.4                 | 62                 |

Cpm values after normalization with *rrs*(16S)

|               | <i>katG</i> | <i>sodA</i> |
|---------------|-------------|-------------|
| 0.02mM 30min  | 0.53        | 1.25        |
| 0.02mM 60min  | 0.56        | 0.85        |
| 0.02mM 120min | 0.32        | 1.01        |
| 0.2mM 30min   | 0.89        | 1.26        |
| 0.2mM 60min   | 0.54        | 1.05        |
| 0.2mM 120min  | 0.5         | 1.21        |
| 2mM 30min     | 0.57        | 0.97        |
| 2mM 60min     | 0.42        | 0.89        |
| 2mM 120min    | 0.92        | 1.08        |
| 20mM 30min    | 4.57        | 1.61        |
| 20mM 60min    | 0.73        | 1.01        |
| 20mM 120min   | 0.51        | 1.54        |
| Control       | 0.49        | 0.88        |
